# Supplementary material for: A novel photic entrainment mechanism for the circadian clock in an insect: involvement of c-fos and cryptochromes
Source: PubMed Central journal article supplement (PMC6145112; doi:10.1186/s40851-018-0109-8), 2018-09-18
Supplement: 40851_2018_109_MOESM2_ESM.pdf [file 40851_2018_109_MOESM2_ESM.pdf]

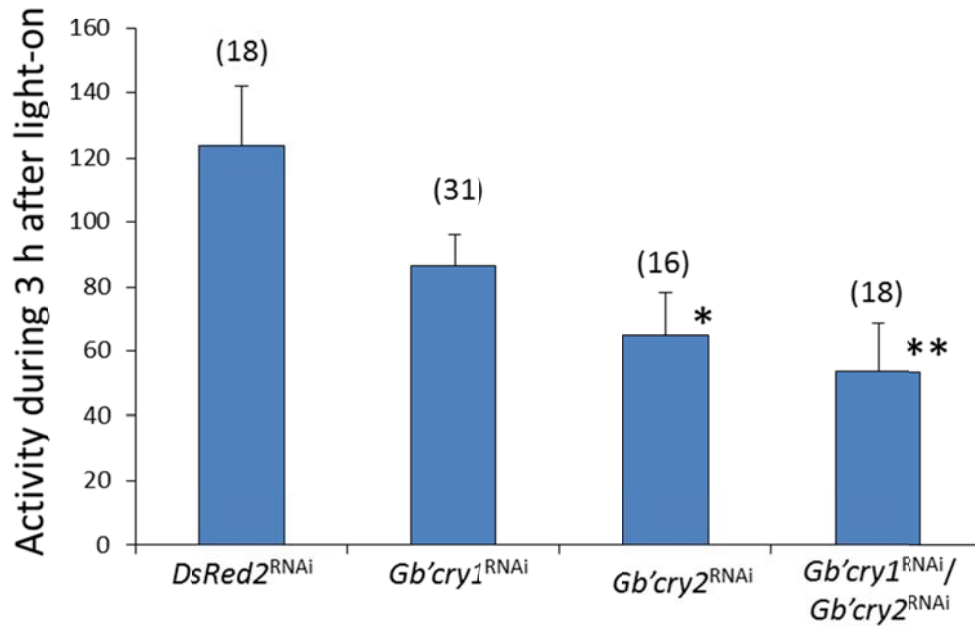

**Figure S1.** Effect of RNAi of *cry* genes on locomotor activity during the first 3 h after light-on in the cricket *Gryllus bimaculatus*. The activity was measured on the first day after 6 h phase advance of light-on. Error bars indicate SEM. Numbers in parenthesis indicate the number of animals used. *Gb'cry2*<sup>RNAi</sup> and *Gb'cry1*<sup>RNAi</sup>/*Gb'cry2*<sup>RNAi</sup> significantly reduced the light-induced locomotor activity compared to *DsRed2*<sup>RNAi</sup> treatment (\*P<0.05, \*\*P<0.01, Dunnett's test).
