# Supplementary material for: A novel photic entrainment mechanism for the circadian clock in an insect: involvement of c-fos and cryptochromes
Source: PubMed Central journal article supplement (PMC6145112; doi:10.1186/s40851-018-0109-8), 2018-09-18
Supplement: 40851_2018_109_MOESM3_ESM.pdf [file 40851_2018_109_MOESM3_ESM.pdf]

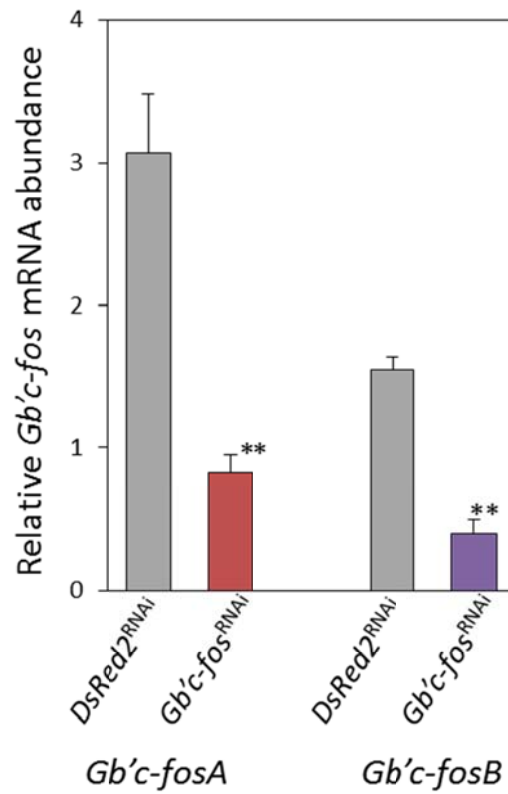

**Figure S2.** *Gb'c-fos<sup>RNAi</sup>* significantly down-regulated both *Gb'c-fosA* and *Gb'c-fosB* mRNA levels in the optic lobe of the cricket *Gryllus bimaculatus* (\*\* $P < 0.01$ , t-test). The optic lobes were collected at ZT20 7 days after the dsRNA injection. mRNA levels were measured by qPCR and are shown relative to those of *Gb'rpI18a*. The values shown are mean  $\pm$  SEM of 6 samples.
