# Supplementary material for: A novel photic entrainment mechanism for the circadian clock in an insect: involvement of c-fos and cryptochromes
Source: PubMed Central journal article supplement (PMC6145112; doi:10.1186/s40851-018-0109-8), 2018-09-18
Supplement: 40851_2018_109_MOESM4_ESM.pdf [file 40851_2018_109_MOESM4_ESM.pdf]

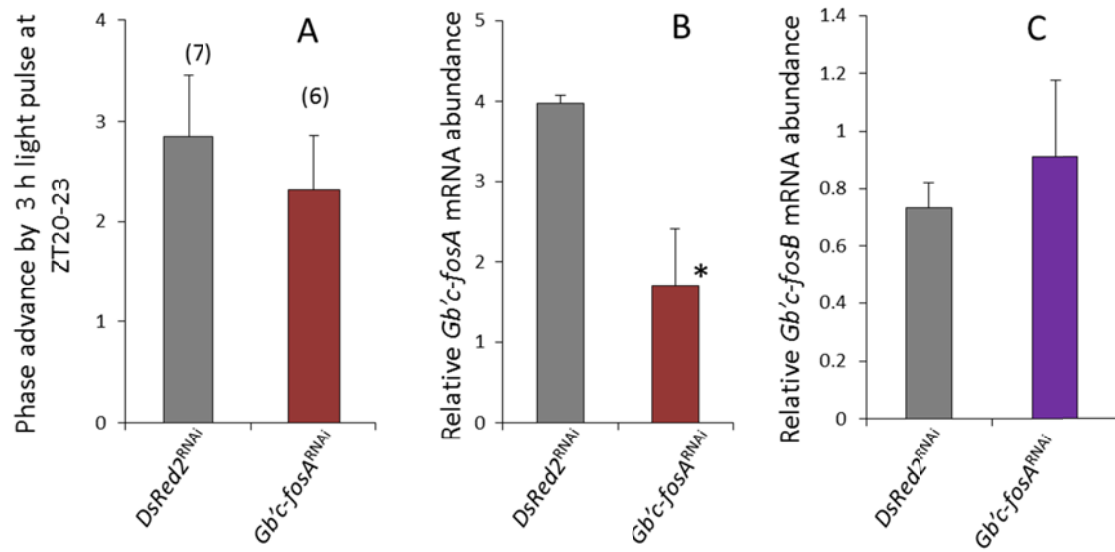

**Figure S3.** A: *Gb'c-fosA*<sup>RNAi</sup> had no significant effects on the light induced phase advance in the cricket *Gryllus bimaculatus*. A 3 h light pulse was given at ZT20 on the day of transfer to DD, which was 7 days after dsRNA injection. Numbers in the parenthesis indicate the number of animals used. B and C: *Gb'c-fosA*<sup>RNAi</sup> significantly knocked down *Gb'c-fosA* mRNA levels (\* $P < 0.05$ , t-test), but had no significant effect on *Gb'c-fosB* mRNA levels. mRNA levels were measured by qPCR and are shown relative to those of *Gb'rp18a*. The values shown are mean  $\pm$  SEM of 4 samples.
